# Supplementary material for: Syntheses, crystal structures, and properties of five mixed-ligand coordination polymers based on novel quaterphenyl-2,5,2′,5′-tetracarboxylic acid ligand
Source: Royal Society of Chemistry journal article supplement (doi:10.1039/c2ce06329h), 2012-01-01
Supplement: c2ce06329h.pdf [file c2ce06329h.pdf]

**Electronic Supplementary Information (ESI) for  
CrystEngComm**

**Syntheses, crystal structures, and properties of five  
mixed-ligand coordination polymers based on novel  
quaterphenyl-2,5,2',5'-tetracarboxylic acid ligand**

Xiu-Tang Zhang,<sup>a,b</sup> Li-Ming Fan,<sup>b</sup> Xian Zhao,<sup>\*a</sup> Di Sun,<sup>\*c</sup> Da-Cheng Li,<sup>b</sup> Jian-Min  
Dou<sup>\*b</sup>

*<sup>a</sup>State Key Laboratory of Crystal Materials, Shandong University, Jinan 250100,  
China.*

*E-mail: zhaoxian@icm.sdu.edu.cn*

*<sup>b</sup>College of Chemistry and Chemical Engineering, Liaocheng University, Liaocheng,  
252059, China.*

*E-mail: jmdou@lcu.edu.cn.*

*<sup>c</sup>School of Chemistry and Chemical Engineering, Shandong University, Jinan 250100,  
P. R. China. E-mail: dsun@sdu.edu.cn.*

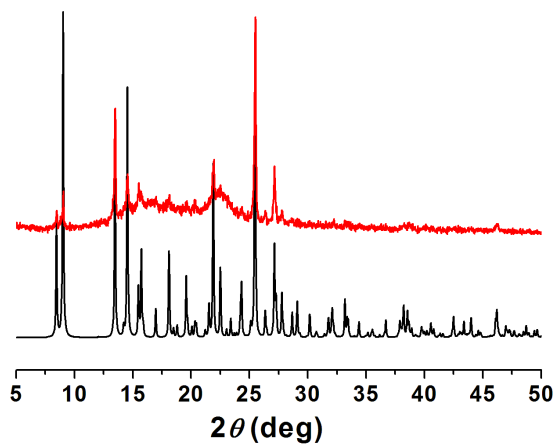

(a)

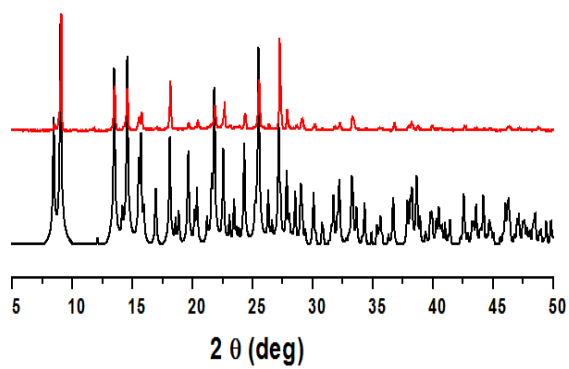

(b)

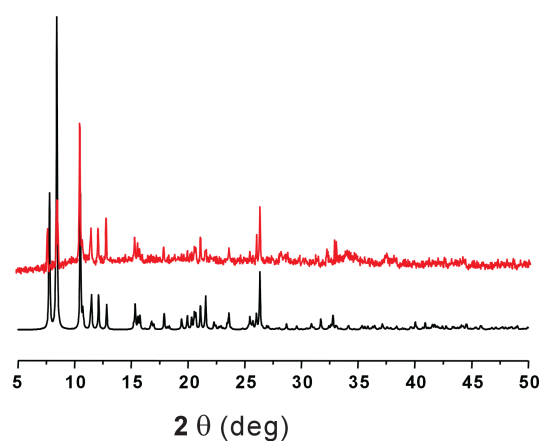

(c)

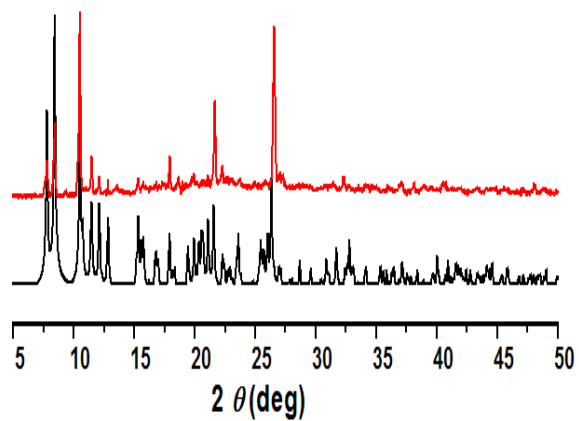

(d)

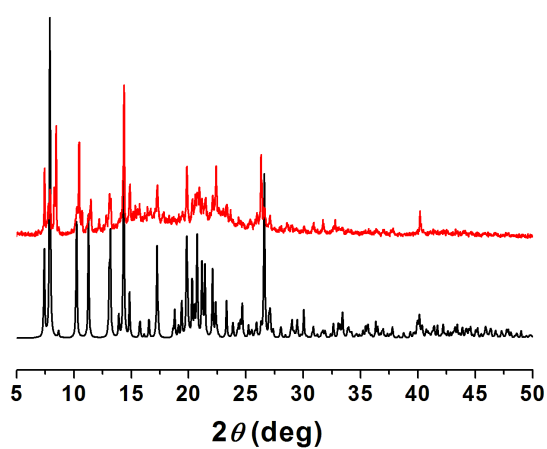

(e)

**Figure S1.** PXRD patterns of (a) **1**, (b) **2**, (c) **3**, (d) **4**, and (e) **5**. Black: calculated from the X-ray single-crystal data; Red: observed for the as-synthesized solids.

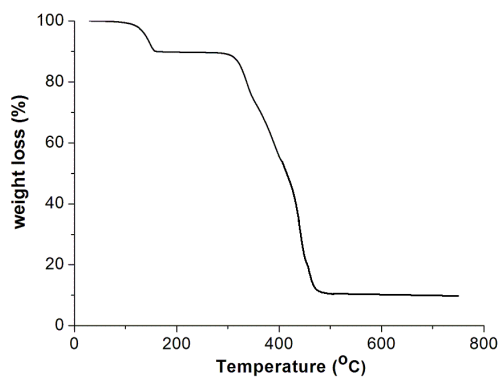

(a)

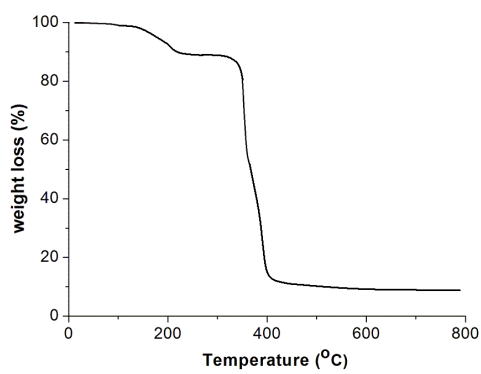

(b)

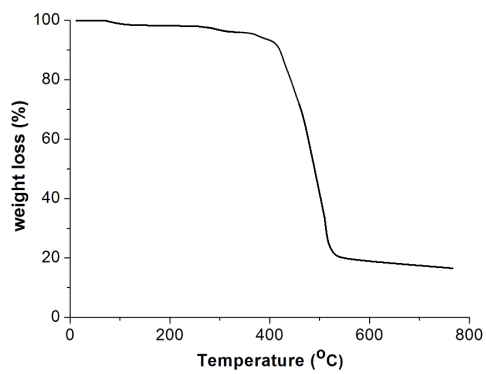

(c)

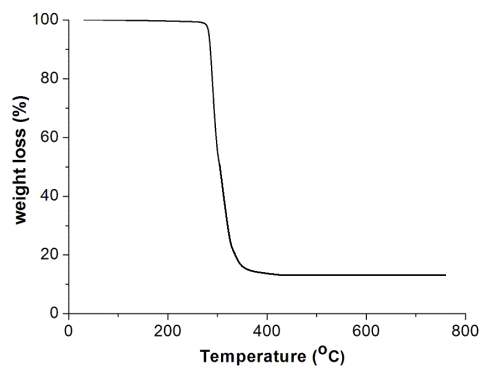

(d)

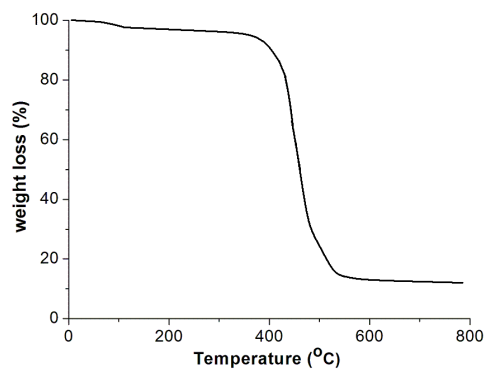

(e)

**Figure S2.** Thermogravimetric analysis (TGA) plots of (a) **1**, (b) **2**, (c) **3**, (d) **4**, and (e) **5**.
